# Supplementary material for: Global city densities: Re-examining urban scaling theory
Source: Frontiers journal article supplement (doi:10.3389/fcosc.2022.879934), 2022-12-05
Supplement: Table_1.docx [file Table_1.docx]

**Appendix:** **Summary OLS and RMA statistics of scalings of log area with log population for countries >5 cities of >100 km2 and >50,000 population, per time frame (N = 933 cities in 2015, 738 in 2000, 591 in 1990, 416 in 1975).**

| **Region** | **Country (n = cities)** | **Dev. Class** | **Year** | **OLS** | | **RMA** | | **P-value** | **R2** |
| --- | --- | --- | --- | --- | --- | --- | --- | --- | --- |
| **Exponent [95% CI]** | **Elevation [95% CI]** | **Exponent [95% CI]** | **Elevation [95% CI]** |
| Sublinear (RMA Exp. CI < 1) | | | | | | | | | |
| Europe | Russia (44) | MDR | 2015 | 0.67 [0.58, 0.75] | -3.72 [-4.83, -2.62] | 0.72 [0.64, 0.81] | -4.40 [-5.50, -3.30] | 0.000 | 0.86 |
| Asia | Japan (33) | MDR | 2015 | 0.77 [0.69, 0.85] | -4.73 [-5.79, -3.66] | 0.80 [0.72, 0.88] | -5.12 [-6.19, -4.06] | 0.000 | 0.93 |
| Northern America | United States (151) | MDR | 2015 | 0.83 [0.80, 0.87] | -5.04 [-5.51, -4.56] | 0.86 [0.83, 0.90] | -5.43 [-5.90, -4.95] | 0.000 | 0.93 |
| Europe | France (11) | MDR | 2015 | 0.73 [0.58, 0.87] | -4.37 [-6.36, -2.37] | 0.75 [0.62, 0.91] | -4.71 [-6.71, -2.72] | 0.000 | 0.93 |
| Oceania | Australia (8) | MDR | 2015 | 0.83 [0.74, 0.92] | -5.18 [-6.36, -4.01] | 0.83 [0.75, 0.92] | -5.24 [-6.42, -4.07] | 0.000 | 0.99 |
| Europe | Spain (11) | MDR | 2015 | 0.72 [0.56, 0.88] | -4.56 [-6.80, -2.32] | 0.75 [0.61, 0.93] | -4.99 [-7.23, -2.75] | 0.000 | 0.92 |
| Northern America | Canada (14) | MDR | 2015 | 0.89 [0.84, 0.94] | -6.26 [-6.92, -5.60] | 0.89 [0.85, 0.94] | -6.30 [-6.96, -5.64] | 0.000 | 0.99 |
| Europe | United Kingdom (23) | MDR | 2015 | 0.88 [0.79, 0.96] | -6.45 [-7.58, -5.32] | 0.90 [0.82, 0.99] | -6.71 [-7.84, -5.58] | 0.000 | 0.96 |
| Asia | Taiwan (7) | LDC | 2015 | 0.63 [0.54, 0.72] | -3.18 [-4.47, -1.90] | 0.63 [0.55, 0.73] | -3.25 [-4.54, -1.97] | 0.000 | 0.98 |
| Asia | India (100) | LDC | 2015 | 0.55 [0.46, 0.64] | -2.43 [-3.73, -1.12] | 0.71 [0.63, 0.81] | -4.78 [-6.08, -3.48] | 0.000 | 0.59 |
| Asia | China (172) | LDC | 2015 | 0.75 [0.70, 0.79] | -5.02 [-5.64, -4.40] | 0.80 [0.76, 0.85] | -5.79 [-6.41, -5.18] | 0.000 | 0.87 |
| Asia | Uzbekistan (6) | LDC | 2015 | 0.63 [0.45, 0.82] | -3.28 [-5.83, -0.72] | 0.65 [0.49, 0.86] | -3.47 [-6.02, -0.92] | 0.001 | 0.96 |
| Latin America and the Caribbean | Brazil (36) | LDC | 2015 | 0.74 [0.66, 0.83] | -4.97 [-6.12, -3.82] | 0.78 [0.70, 0.87] | -5.48 [-6.63, -4.33] | 0.000 | 0.91 |
| Asia | Indonesia (50) | LDC | 2015 | 0.77 [0.68, 0.85] | -5.04 [-6.21, -3.87] | 0.82 [0.74, 0.91] | -5.78 [-6.95, -4.61] | 0.000 | 0.87 |
| Asia | Vietnam (10) | LDC | 2015 | 0.76 [0.63, 0.89] | -4.98 [-6.79, -3.17] | 0.78 [0.66, 0.92] | -5.21 [-7.02, -3.40] | 0.000 | 0.96 |
| Asia | Turkey (13) | LDC | 2015 | 0.71 [0.56, 0.87] | -4.70 [-6.88, -2.51] | 0.75 [0.61, 0.92] | -5.22 [-7.41, -3.04] | 0.000 | 0.9 |
| Asia | South Korea (9) | LDC | 2015 | 0.76 [0.62, 0.90] | -5.26 [-7.21, -3.30] | 0.77 [0.65, 0.92] | -5.47 [-7.43, -3.52] | 0.000 | 0.96 |
| Latin America and the Caribbean | Mexico (28) | LDC | 2015 | 0.80 [0.69, 0.90] | -5.71 [-7.17, -4.24] | 0.84 [0.74, 0.95] | -6.29 [-7.75, -4.82] | 0.000 | 0.9 |
| Latin America and the Caribbean | Argentina (7) | LDC | 2015 | 0.83 [0.73, 0.94] | -6.14 [-7.63, -4.65] | 0.84 [0.74, 0.95] | -6.21 [-7.70, -4.72] | 0.000 | 0.99 |
| Africa | Egypt (13) | LDC | 2015 | 0.70 [0.52, 0.89] | -4.54 [-7.13, -1.95] | 0.76 [0.59, 0.97] | -5.28 [-7.87, -2.69] | 0.000 | 0.86 |
| Asia | Bangladesh (33) | LDCL | 2015 | 0.82 [0.71, 0.92] | -5.59 [-7.00, -4.18] | 0.86 [0.77, 0.97] | -6.24 [-7.64, -4.83] | 0.000 | 0.89 |
| Linear (RMA Exp. CI = 1) | | | | | | | | | |
| Europe | Germany (20) | MDR | 2015 | 0.87 [0.76, 0.97] | -6.20 [-7.59, -4.81] | 0.89 [0.79, 1.00] | -6.53 [-7.92, -5.14] | 0.000 | 0.95 |
| Europe | Italy (8) | MDR | 2015 | 0.94 [0.66, 1.22] | -7.50 [-11.40, -3.61] | 0.98 [0.74, 1.30] | -8.07 [-11.97, -4.18] | 0.000 | 0.92 |
| Europe | Ukraine (11) | MDR | 2015 | 0.69 [0.32, 1.06] | -4.02 [-9.11, 1.06] | 0.85 [0.56, 1.30] | -6.19 [-11.28, -1.10] | 0.002 | 0.66 |
| Europe | Netherlands (5) | MDR | 2015 | 0.88 [0.48, 1.28] | -6.39 [-11.72, -1.06] | 0.91 [0.59, 1.39] | -6.74 [-12.08, -1.41] | 0.006 | 0.94 |
| Europe | Belgium (5) | MDR | 2015 | 0.53 [-0.07, 1.14] | -1.70 [-9.64, 6.25] | 0.63 [0.27, 1.48] | -2.92 [-10.87, 5.02] | 0.068 | 0.72 |
| Europe | Poland (7) | MDR | 2015 | 0.99 [0.56, 1.42] | -7.97 [-13.77, -2.18] | 1.06 [0.71, 1.57] | -8.89 [-14.68, -3.09] | 0.002 | 0.88 |
| Asia | Pakistan (13) | LDC | 2015 | 0.74 [0.53, 0.94] | -5.26 [-8.27, -2.24] | 0.80 [0.62, 1.03] | -6.17 [-9.19, -3.16] | 0.000 | 0.85 |
| Asia | Saudi Arabia (10) | LDC | 2015 | 0.77 [0.56, 0.97] | -5.21 [-8.04, -2.38] | 0.81 [0.63, 1.04] | -5.76 [-8.59, -2.93] | 0.000 | 0.9 |
| Asia | Malaysia (9) | LDC | 2015 | 0.81 [0.62, 0.99] | -5.52 [-8.05, -3.00] | 0.83 [0.67, 1.04] | -5.89 [-8.41, -3.36] | 0.000 | 0.94 |
| Asia | Iran (11) | LDC | 2015 | 0.86 [0.69, 1.03] | -6.85 [-9.22, -4.47] | 0.89 [0.73, 1.07] | -7.25 [-9.62, -4.87] | 0.000 | 0.94 |
| Latin America and the Caribbean | Venezuela (7) | LDC | 2015 | 0.68 [0.37, 0.98] | -4.23 [-8.51, 0.04] | 0.73 [0.48, 1.09] | -4.94 [-9.21, -0.66] | 0.002 | 0.87 |
| Latin America and the Caribbean | Colombia (5) | LDC | 2015 | 0.66 [0.31, 1.00] | -4.33 [-9.40, 0.75] | 0.68 [0.42, 1.11] | -4.71 [-9.78, 0.36] | 0.009 | 0.93 |
| Africa | Nigeria (19) | LDC | 2015 | 0.80 [0.58, 1.01] | -5.75 [-8.84, -2.67] | 0.90 [0.71, 1.15] | -7.26 [-10.35, -4.18] | 0.000 | 0.78 |
| Africa | South Africa (8) | LDC | 2015 | 0.97 [0.79, 1.16] | -7.93 [-10.50, -5.36] | 0.99 [0.83, 1.19] | -8.17 [-10.74, -5.60] | 0.000 | 0.97 |
| Asia | Philippines (5) | LDC | 2015 | 0.71 [0.33, 1.08] | -4.39 [-9.88, 1.10] | 0.73 [0.45, 1.20] | -4.81 [-10.30, 0.68] | 0.010 | 0.92 |
| Asia | Iraq (6) | LDC | 2015 | 1.04 [0.61, 1.46] | -9.44 [-15.43, -3.46] | 1.08 [0.74, 1.58] | -10.07 [-16.05, -4.08] | 0.002 | 0.92 |
| Africa | Morocco (5) | LDC | 2015 | 0.87 [0.31, 1.43] | -7.24 [-15.26, 0.79] | 0.92 [0.52, 1.64] | -7.98 [-16.00, 0.04] | 0.016 | 0.89 |
| Sublinear (RMA Exp. CI < 1) | | | | | | | | | |
| Europe | Russia (42) | MDR | 2000 | 0.70 [0.61, 0.78] | -4.22 [-5.34, -3.11] | 0.74 [0.67, 0.83] | -4.85 [-5.97, -3.74] | 0.000 | 0.88 |
| Asia | Japan (30) | MDR | 2000 | 0.80 [0.71, 0.89] | -5.22 [-6.40, -4.04] | 0.83 [0.75, 0.92] | -5.64 [-6.82, -4.46] | 0.000 | 0.93 |
| Northern America | United States (123) | MDR | 2000 | 0.85 [0.81, 0.89] | -5.27 [-5.81, -4.74] | 0.88 [0.84, 0.92] | -5.67 [-6.20, -5.13] | 0.000 | 0.93 |
| Europe | France (11) | MDR | 2000 | 0.75 [0.59, 0.92] | -4.73 [-6.99, -2.48] | 0.79 [0.64, 0.97] | -5.16 [-7.41, -2.90] | 0.000 | 0.92 |
| Northern America | Canada (11) | MDR | 2000 | 0.88 [0.80, 0.96] | -6.06 [-7.13, -4.99] | 0.89 [0.81, 0.97] | -6.15 [-7.22, -5.08] | 0.000 | 0.99 |
| Oceania | Australia (8) | MDR | 2000 | 0.84 [0.72, 0.97] | -5.26 [-6.96, -3.56] | 0.85 [0.73, 0.99] | -5.39 [-7.09, -3.69] | 0.000 | 0.98 |
| Europe | Spain (8) | MDR | 2000 | 0.68 [0.44, 0.91] | -3.94 [-7.20, -0.69] | 0.72 [0.52, 0.99] | -4.49 [-7.75, -1.24] | 0.000 | 0.89 |
| Europe | United Kingdom (21) | MDR | 2000 | 0.89 [0.81, 0.97] | -6.58 [-7.67, -5.48] | 0.91 [0.83, 0.99] | -6.79 [-7.89, -5.70] | 0.000 | 0.96 |
| Asia | Taiwan (7) | LDC | 2000 | 0.65 [0.55, 0.75] | -3.57 [-4.96, -2.18] | 0.66 [0.57, 0.76] | -3.65 [-5.04, -2.26] | 0.000 | 0.98 |
| Asia | Uzbekistan (6) | LDC | 2000 | 0.65 [0.51, 0.79] | -3.46 [-5.32, -1.60] | 0.65 [0.53, 0.81] | -3.56 [-5.42, -1.70] | 0.000 | 0.98 |
| Latin America and the Caribbean | Brazil (36) | LDC | 2000 | 0.74 [0.67, 0.81] | -4.88 [-5.86, -3.91] | 0.77 [0.70, 0.84] | -5.26 [-6.23, -4.28] | 0.000 | 0.93 |
| Latin America and the Caribbean | Mexico (25) | LDC | 2000 | 0.77 [0.68, 0.87] | -5.34 [-6.65, -4.03] | 0.80 [0.71, 0.90] | -5.77 [-7.07, -4.46] | 0.000 | 0.92 |
| Asia | India (71) | LDC | 2000 | 0.66 [0.56, 0.77] | -4.13 [-5.67, -2.59] | 0.80 [0.70, 0.92] | -6.10 [-7.64, -4.56] | 0.000 | 0.69 |
| Asia | China (129) | LDC | 2000 | 0.82 [0.76, 0.87] | -6.07 [-6.87, -5.28] | 0.88 [0.82, 0.94] | -6.93 [-7.72, -6.14] | 0.000 | 0.87 |
| Asia | Turkey (10) | LDC | 2000 | 0.75 [0.60, 0.90] | -5.16 [-7.30, -3.02] | 0.77 [0.63, 0.94] | -5.48 [-7.62, -3.34] | 0.000 | 0.94 |
| Asia | Indonesia (36) | LDC | 2000 | 0.82 [0.73, 0.90] | -5.80 [-7.00, -4.59] | 0.85 [0.77, 0.94] | -6.31 [-7.51, -5.10] | 0.000 | 0.92 |
| Africa | Egypt (7) | LDC | 2000 | 0.78 [0.63, 0.92] | -5.68 [-7.80, -3.55] | 0.79 [0.65, 0.95] | -5.83 [-7.95, -3.71] | 0.000 | 0.97 |
| Asia | Vietnam (10) | LDC | 2000 | 0.80 [0.63, 0.96] | -5.58 [-7.79, -3.37] | 0.82 [0.67, 1.00] | -5.91 [-8.12, -3.70] | 0.000 | 0.94 |
| Linear (RMA Exp. CI = 1) | | | | | | | | | |
| Europe | Germany (19) | MDR | 2000 | 0.89 [0.79, 0.98] | -6.48 [-7.74, -5.22] | 0.90 [0.82, 1.00] | -6.73 [-7.99, -5.47] | 0.000 | 0.96 |
| Europe | Italy (8) | MDR | 2000 | 0.93 [0.63, 1.23] | -7.41 [-11.55, -3.27] | 0.98 [0.72, 1.32] | -8.05 [-12.20, -3.91] | 0.000 | 0.91 |
| Europe | Ukraine (11) | MDR | 2000 | 0.74 [0.35, 1.14] | -4.81 [-10.23, 0.61] | 0.91 [0.60, 1.39] | -7.09 [-12.51, -1.67] | 0.002 | 0.67 |
| Europe | Belgium (5) | MDR | 2000 | 0.57 [-0.06, 1.21] | -2.25 [-10.49, 5.98] | 0.67 [0.29, 1.55] | -3.49 [-11.73, 4.74] | 0.063 | 0.74 |
| Europe | Poland (7) | MDR | 2000 | 1.00 [0.54, 1.46] | -8.23 [-14.52, -1.94] | 1.08 [0.71, 1.63] | -9.29 [-15.58, -2.99] | 0.003 | 0.86 |
| Latin America and the Caribbean | Argentina (7) | LDC | 2000 | 0.86 [0.73, 1.00] | -6.53 [-8.41, -4.65] | 0.87 [0.75, 1.01] | -6.64 [-8.52, -4.76] | 0.000 | 0.98 |
| Asia | Saudi Arabia (7) | LDC | 2000 | 0.69 [0.42, 0.97] | -4.02 [-7.82, -0.21] | 0.73 [0.51, 1.06] | -4.57 [-8.38, -0.76] | 0.001 | 0.89 |
| Asia | Malaysia (8) | LDC | 2000 | 0.86 [0.68, 1.04] | -6.22 [-8.54, -3.90] | 0.88 [0.72, 1.07] | -6.46 [-8.78, -4.14] | 0.000 | 0.96 |
| Asia | Pakistan (8) | LDC | 2000 | 0.80 [0.58, 1.02] | -6.23 [-9.50, -2.96] | 0.83 [0.64, 1.08] | -6.67 [-9.93, -3.40] | 0.000 | 0.93 |
| Asia | South Korea (7) | LDC | 2000 | 0.83 [0.60, 1.05] | -6.40 [-9.65, -3.15] | 0.85 [0.65, 1.10] | -6.73 [-9.98, -3.48] | 0.000 | 0.95 |
| Africa | Nigeria (16) | LDC | 2000 | 0.78 [0.56, 1.00] | -5.55 [-8.61, -2.48] | 0.87 [0.68, 1.12] | -6.79 [-9.86, -3.73] | 0.000 | 0.81 |
| Latin America and the Caribbean | Colombia (5) | LDC | 2000 | 0.67 [0.31, 1.02] | -4.47 [-9.60, 0.67] | 0.69 [0.43, 1.13] | -4.86 [-9.99, 0.27] | 0.009 | 0.92 |
| Asia | Iran (7) | LDC | 2000 | 0.87 [0.62, 1.12] | -6.89 [-10.45, -3.32] | 0.90 [0.68, 1.18] | -7.27 [-10.84, -3.70] | 0.000 | 0.94 |
| Africa | South Africa (8) | LDC | 2000 | 1.03 [0.83, 1.22] | -8.46 [-11.12, -5.80] | 1.04 [0.87, 1.25] | -8.71 [-11.36, -6.05] | 0.000 | 0.97 |
| Latin America and the Caribbean | Venezuela (6) | LDC | 2000 | 0.68 [0.26, 1.11] | -4.29 [-10.22, 1.64] | 0.75 [0.44, 1.29] | -5.20 [-11.13, 0.73] | 0.011 | 0.83 |
| Asia | Bangladesh (18) | LDCL | 2000 | 0.85 [0.70, 1.01] | -6.23 [-8.37, -4.08] | 0.90 [0.76, 1.07] | -6.90 [-9.04, -4.75] | 0.000 | 0.9 |
| Sublinear (RMA Exp. CI < 1) | | | | | | | | | |
| Europe | Russia (38) | MDR | 1990 | 0.78 [0.71, 0.85] | -5.39 [-6.35, -4.43] | 0.80 [0.74, 0.88] | -5.77 [-6.73, -4.81] | 0.000 | 0.93 |
| Northern America | United States (97) | MDR | 1990 | 0.82 [0.78, 0.87] | -5.06 [-5.66, -4.46] | 0.85 [0.81, 0.90] | -5.45 [-6.05, -4.85] | 0.000 | 0.93 |
| Asia | Japan (30) | MDR | 1990 | 0.81 [0.72, 0.90] | -5.43 [-6.63, -4.23] | 0.84 [0.76, 0.93] | -5.85 [-7.05, -4.65] | 0.000 | 0.93 |
| Europe | France (11) | MDR | 1990 | 0.77 [0.63, 0.91] | -5.02 [-6.94, -3.10] | 0.79 [0.66, 0.95] | -5.32 [-7.24, -3.41] | 0.000 | 0.94 |
| Northern America | Canada (11) | MDR | 1990 | 0.86 [0.76, 0.96] | -5.78 [-7.11, -4.45] | 0.87 [0.78, 0.98] | -5.91 [-7.24, -4.59] | 0.000 | 0.98 |
| Europe | United Kingdom (21) | MDR | 1990 | 0.90 [0.82, 0.98] | -6.69 [-7.71, -5.68] | 0.91 [0.84, 0.99] | -6.88 [-7.89, -5.86] | 0.000 | 0.97 |
| Asia | Taiwan (7) | LDC | 1990 | 0.69 [0.56, 0.81] | -4.08 [-5.79, -2.37] | 0.69 [0.58, 0.83] | -4.19 [-5.90, -2.48] | 0.000 | 0.98 |
| Latin America and the Caribbean | Brazil (30) | LDC | 1990 | 0.75 [0.68, 0.81] | -4.90 [-5.82, -3.99] | 0.77 [0.70, 0.84] | -5.17 [-6.08, -4.25] | 0.000 | 0.95 |
| Latin America and the Caribbean | Mexico (22) | LDC | 1990 | 0.72 [0.63, 0.82] | -4.58 [-5.89, -3.28] | 0.75 [0.66, 0.85] | -4.97 [-6.28, -3.67] | 0.000 | 0.93 |
| Asia | India (51) | LDC | 1990 | 0.68 [0.55, 0.82] | -4.48 [-6.46, -2.51] | 0.84 [0.71, 0.98] | -6.65 [-8.63, -4.67] | 0.000 | 0.67 |
| Asia | China (99) | LDC | 1990 | 0.87 [0.80, 0.93] | -6.81 [-7.79, -5.83] | 0.93 [0.86, 1.00] | -7.74 [-8.71, -6.76] | 0.000 | 0.86 |
| Linear (RMA Exp. CI = 1) | | | | | | | | | |
| Europe | Germany (19) | MDR | 1990 | 0.90 [0.81, 0.99] | -6.70 [-7.94, -5.46] | 0.92 [0.83, 1.02] | -6.93 [-8.17, -5.69] | 0.000 | 0.96 |
| Oceania | Australia (8) | MDR | 1990 | 0.86 [0.71, 1.01] | -5.54 [-7.52, -3.55] | 0.88 [0.74, 1.04] | -5.71 [-7.69, -3.72] | 0.000 | 0.97 |
| Europe | Spain (7) | MDR | 1990 | 0.62 [0.31, 0.94] | -3.27 [-7.60, 1.06] | 0.68 [0.44, 1.06] | -4.05 [-8.38, 0.28] | 0.004 | 0.84 |
| Europe | Belgium (5) | MDR | 1990 | 0.61 [0.19, 1.04] | -2.90 [-8.41, 2.61] | 0.66 [0.36, 1.21] | -3.45 [-8.96, 2.06] | 0.019 | 0.88 |
| Europe | Italy (8) | MDR | 1990 | 0.92 [0.59, 1.24] | -7.29 [-11.85, -2.73] | 0.97 [0.70, 1.35] | -8.08 [-12.64, -3.52] | 0.000 | 0.89 |
| Europe | Ukraine (11) | MDR | 1990 | 0.76 [0.33, 1.20] | -5.15 [-11.08, 0.78] | 0.95 [0.62, 1.48] | -7.77 [-13.70, -1.84] | 0.003 | 0.64 |
| Europe | Poland (7) | MDR | 1990 | 0.99 [0.52, 1.46] | -8.25 [-14.68, -1.83] | 1.07 [0.70, 1.64] | -9.35 [-15.78, -2.93] | 0.003 | 0.86 |
| Latin America and the Caribbean | Argentina (7) | LDC | 1990 | 0.87 [0.74, 1.00] | -6.67 [-8.44, -4.91] | 0.88 [0.76, 1.01] | -6.77 [-8.54, -5.00] | 0.000 | 0.98 |
| Asia | Iran (6) | LDC | 1990 | 0.80 [0.61, 0.99] | -5.80 [-8.48, -3.13] | 0.81 [0.64, 1.03] | -5.97 [-8.64, -3.29] | 0.000 | 0.97 |
| Asia | Indonesia (29) | LDC | 1990 | 0.90 [0.80, 0.99] | -7.00 [-8.38, -5.62] | 0.93 [0.84, 1.03] | -7.47 [-8.85, -6.10] | 0.000 | 0.93 |
| Asia | Pakistan (7) | LDC | 1990 | 0.86 [0.65, 1.06] | -7.06 [-10.09, -4.03] | 0.87 [0.69, 1.10] | -7.33 [-10.37, -4.30] | 0.000 | 0.96 |
| Asia | South Korea (7) | LDC | 1990 | 0.83 [0.59, 1.06] | -6.48 [-9.87, -3.08] | 0.85 [0.65, 1.11] | -6.84 [-10.23, -3.44] | 0.000 | 0.94 |
| Asia | Malaysia (5) | LDC | 1990 | 0.94 [0.76, 1.12] | -7.27 [-9.67, -4.86] | 0.94 [0.78, 1.14] | -7.34 [-9.74, -4.93] | 0.000 | 0.99 |
| Asia | Vietnam (5) | LDC | 1990 | 0.80 [0.46, 1.13] | -5.72 [-10.41, -1.02] | 0.82 [0.55, 1.22] | -6.00 [-10.70, -1.31] | 0.005 | 0.95 |
| Asia | Turkey (5) | LDC | 1990 | 0.77 [0.38, 1.17] | -5.55 [-11.21, 0.10] | 0.80 [0.50, 1.29] | -5.97 [-11.63, -0.32] | 0.008 | 0.93 |
| Asia | Saudi Arabia (7) | LDC | 1990 | 0.70 [0.26, 1.13] | -4.05 [-10.02, 1.92] | 0.79 [0.47, 1.34] | -5.38 [-11.34, 0.59] | 0.009 | 0.77 |
| Africa | South Africa (7) | LDC | 1990 | 1.03 [0.77, 1.30] | -8.42 [-12.05, -4.78] | 1.06 [0.83, 1.36] | -8.76 [-12.40, -5.13] | 0.000 | 0.95 |
| Africa | Nigeria (8) | LDC | 1990 | 0.87 [0.51, 1.23] | -6.85 [-11.97, -1.74] | 0.94 [0.65, 1.37] | -7.87 [-12.98, -2.75] | 0.001 | 0.85 |
| Latin America and the Caribbean | Venezuela (5) | LDC | 1990 | 0.69 [0.08, 1.30] | -4.36 [-12.82, 4.11] | 0.76 [0.37, 1.58] | -5.40 [-13.87, 3.06] | 0.036 | 0.81 |
| Asia | Bangladesh (11) | LDCL | 1990 | 0.88 [0.70, 1.06] | -6.86 [-9.42, -4.29] | 0.91 [0.75, 1.11] | -7.31 [-9.88, -4.75] | 0.000 | 0.93 |
| Sublinear (RMA Exp. CI < 1) | | | | | | | | | |
| Europe | Russia (30) | MDR | 1975 | 0.79 [0.70, 0.88] | -5.55 [-6.77, -4.33] | 0.82 [0.74, 0.92] | -6.00 [-7.22, -4.79] | 0.000 | 0.92 |
| Asia | Japan (29) | MDR | 1975 | 0.81 [0.72, 0.91] | -5.45 [-6.75, -4.15] | 0.85 [0.76, 0.95] | -5.93 [-7.23, -4.63] | 0.000 | 0.92 |
| Europe | France (11) | MDR | 1975 | 0.80 [0.67, 0.94] | -5.52 [-7.27, -3.76] | 0.82 [0.70, 0.96] | -5.76 [-7.52, -4.01] | 0.000 | 0.96 |
| Latin America and the Caribbean | Mexico (15) | LDC | 1975 | 0.71 [0.62, 0.79] | -4.35 [-5.54, -3.15] | 0.72 [0.64, 0.81] | -4.55 [-5.74, -3.36] | 0.000 | 0.96 |
| Asia | Taiwan (5) | LDC | 1975 | 0.71 [0.56, 0.87] | -4.44 [-6.58, -2.30] | 0.72 [0.58, 0.89] | -4.51 [-6.65, -2.36] | 0.001 | 0.99 |
| Latin America and the Caribbean | Brazil (20) | LDC | 1975 | 0.79 [0.69, 0.88] | -5.35 [-6.62, -4.08] | 0.81 [0.72, 0.90] | -5.65 [-6.92, -4.38] | 0.000 | 0.95 |
| Asia | India (35) | LDC | 1975 | 0.68 [0.52, 0.83] | -4.32 [-6.53, -2.11] | 0.81 [0.67, 0.97] | -6.16 [-8.37, -3.95] | 0.000 | 0.71 |
| Linear (RMA Exp. CI = 1) | | | | | | | | | |
| Northern America | United States (72) | MDR | 1975 | 0.84 [0.75, 0.92] | -5.38 [-6.54, -4.21] | 0.91 [0.83, 1.01] | -6.40 [-7.57, -5.23] | 0.000 | 0.84 |
| Europe | Germany (17) | MDR | 1975 | 0.90 [0.81, 0.99] | -6.76 [-7.96, -5.56] | 0.92 [0.83, 1.01] | -6.95 [-8.15, -5.75] | 0.000 | 0.97 |
| Europe | United Kingdom (20) | MDR | 1975 | 0.91 [0.83, 1.00] | -6.86 [-7.99, -5.73] | 0.93 [0.85, 1.02] | -7.07 [-8.20, -5.94] | 0.000 | 0.97 |
| Northern America | Canada (8) | MDR | 1975 | 0.82 [0.65, 0.99] | -5.25 [-7.57, -2.93] | 0.84 [0.68, 1.03] | -5.49 [-7.81, -3.17] | 0.000 | 0.96 |
| Europe | Spain (6) | MDR | 1975 | 0.74 [0.32, 1.15] | -4.94 [-10.74, 0.86] | 0.79 [0.48, 1.31] | -5.75 [-11.55, 0.05] | 0.008 | 0.86 |
| Europe | Ukraine (11) | MDR | 1975 | 0.83 [0.36, 1.30] | -6.10 [-12.49, 0.29] | 1.03 [0.67, 1.60] | -8.92 [-15.31, -2.54] | 0.003 | 0.64 |
| Europe | Poland (7) | MDR | 1975 | 0.91 [0.40, 1.42] | -7.15 [-14.15, -0.15] | 1.01 [0.62, 1.65] | -8.56 [-15.57, -1.56] | 0.006 | 0.81 |
| Oceania | Australia (5) | MDR | 1975 | 0.90 [0.23, 1.58] | -6.09 [-15.45, 3.26] | 0.97 [0.51, 1.86] | -7.09 [-16.44, 2.26] | 0.024 | 0.86 |
| Latin America and the Caribbean | Argentina (7) | LDC | 1975 | 0.86 [0.69, 1.04] | -6.58 [-8.97, -4.20] | 0.88 [0.72, 1.07] | -6.76 [-9.15, -4.38] | 0.000 | 0.97 |
| Asia | China (65) | LDC | 1975 | 0.91 [0.80, 1.01] | -7.42 [-8.89, -5.94] | 1.00 [0.90, 1.10] | -8.69 [-10.17, -7.22] | 0.000 | 0.83 |
| Asia | South Korea (5) | LDC | 1975 | 0.75 [0.44, 1.06] | -5.30 [-9.87, -0.74] | 0.77 [0.52, 1.15] | -5.58 [-10.14, -1.02] | 0.005 | 0.95 |
| Asia | Pakistan (6) | LDC | 1975 | 0.88 [0.49, 1.26] | -7.23 [-12.70, -1.77] | 0.92 [0.61, 1.38] | -7.84 [-13.30, -2.37] | 0.003 | 0.91 |
| Africa | Nigeria (6) | LDC | 1975 | 0.93 [0.48, 1.38] | -7.56 [-13.85, -1.27] | 0.98 [0.63, 1.53] | -8.33 [-14.62, -2.03] | 0.005 | 0.89 |
| Africa | South Africa (5) | LDC | 1975 | 0.95 [0.35, 1.56] | -7.16 [-15.33, 1.02] | 1.01 [0.57, 1.78] | -7.90 [-16.07, 0.27] | 0.015 | 0.89 |
| Asia | Bangladesh (5) | LDCL | 1975 | 0.72 [-0.00, 1.44] | -4.99 [-15.42, 5.43] | 0.82 [0.37, 1.81] | -6.44 [-16.87, 3.98] | 0.051 | 0.77 |
| Superlinear (RMA Exp. CI > 1) | | | | | | | | | |
| Europe | Italy (6) | MDR | 1975 | 1.26 [1.06, 1.47] | -12.39 [-15.26, -9.53] | 1.27 [1.09, 1.49] | -12.51 [-15.38, -9.64] | 0.000 | 0.99 |
