# Supplementary material for: Global city densities: Re-examining urban scaling theory
Source: Frontiers journal article supplement (doi:10.3389/fcosc.2022.879934), 2022-12-05

**Supplementary. Scaling parameters of all countries over time.**

**Countries that changed from linear to sublinear:** Argentina, Australia, Bangladesh, Canada, China, Indonesia, South Korea, Spain, Turkey, United States, United Kingdom

**Countries that stayed linear:** Belgium, Colombia, Germany, Iran, Malaysia, Nigeria, Pakistan, Poland, Saudi Arabia, South Africa, Ukraine, Venezuela

**Countries that stayed sublinear:** Brazil, Egypt, France, India, Japan, Mexico, Russia, Taiwan, Uzbekistan

**Countries that changed from superlinear to linear:** Italy


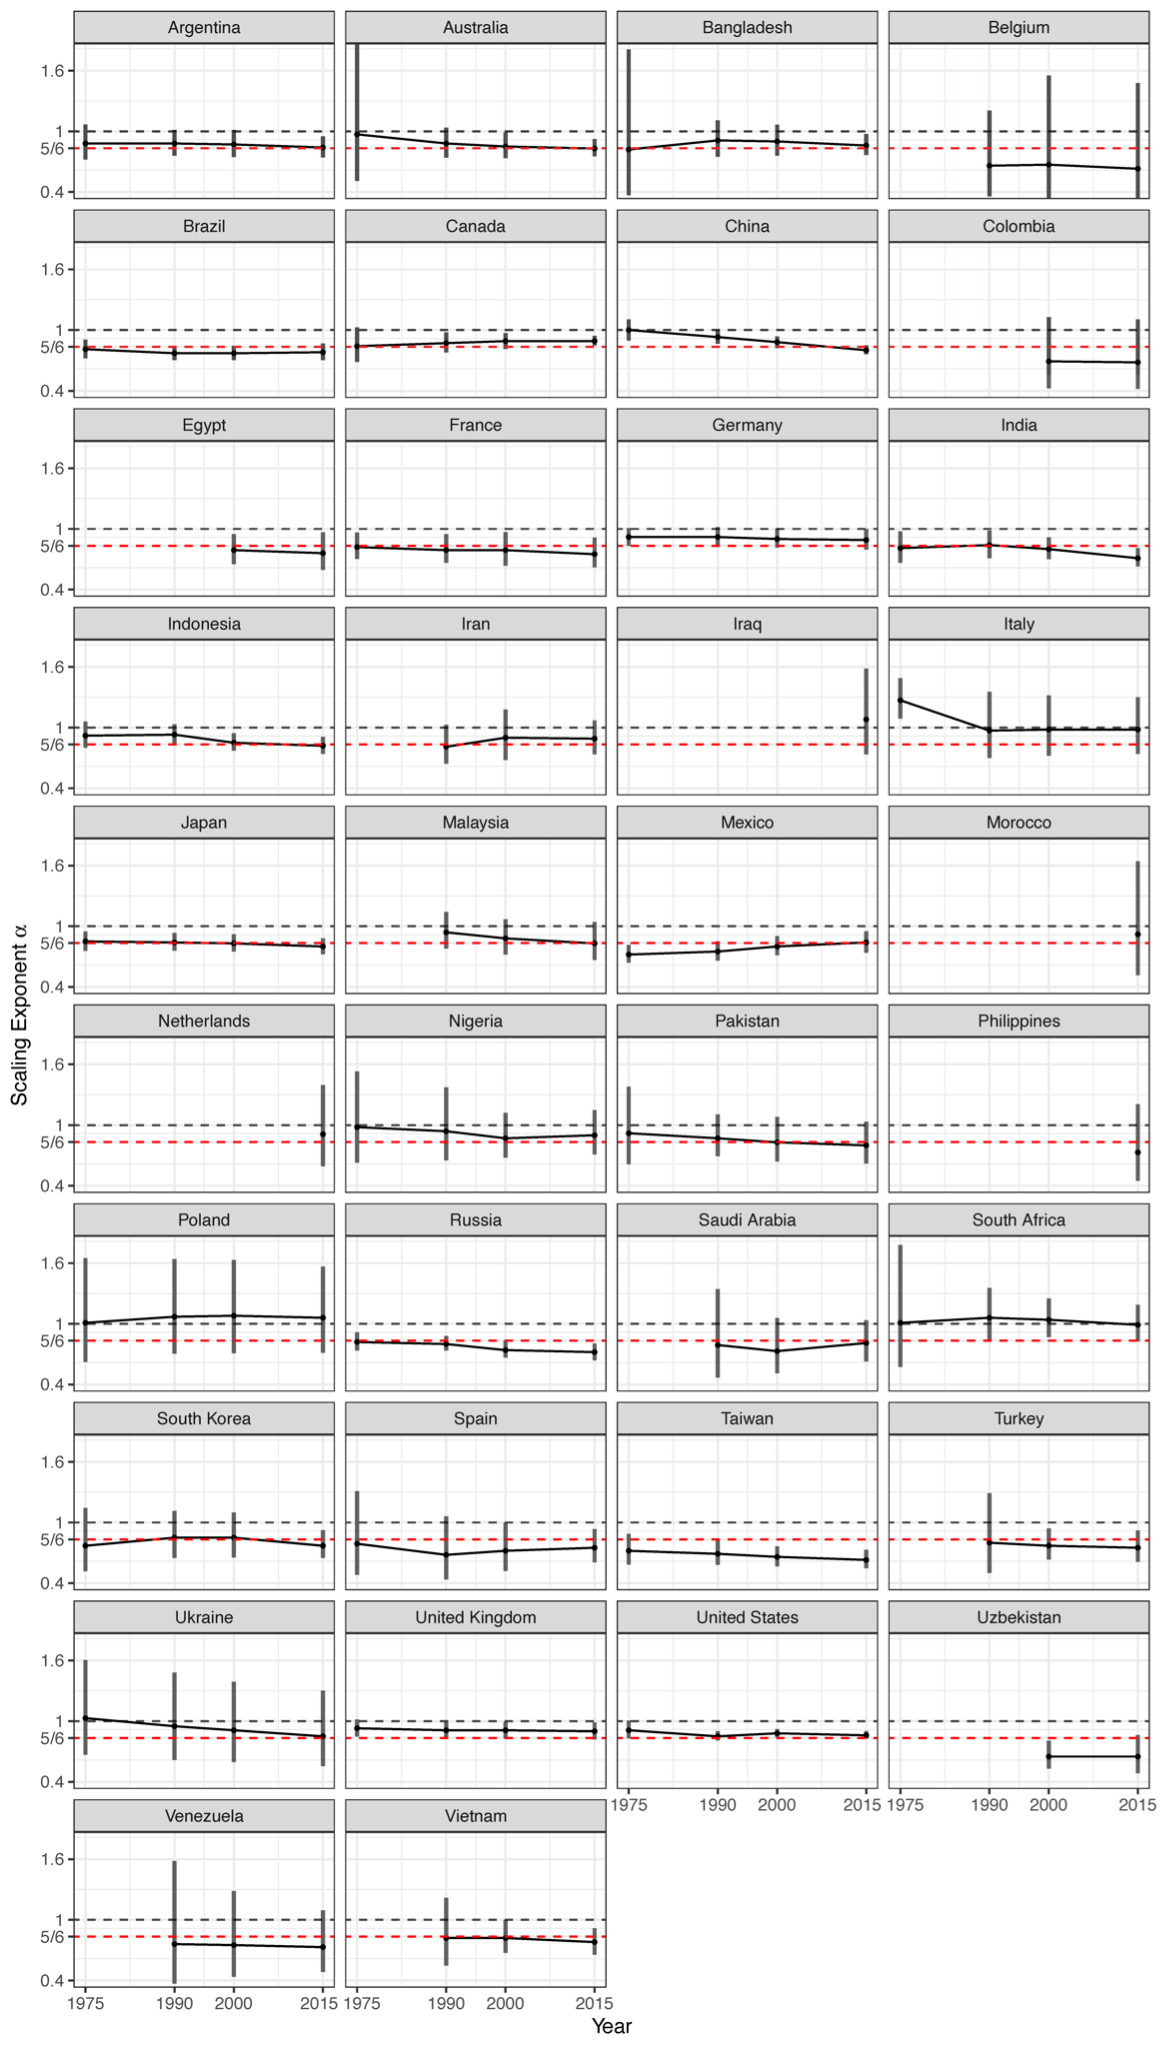

Supplement: Table_2.docx [file Table_2.docx]
